# Supplementary material for: In Vitro and In Silico Analysis of the Anti-cancer Effects of Eurycomanone and Eurycomalactone from <em>Eurycoma longifolia.</em>
Source: Preprints.org preprint supplement (doi:10.20944/preprints202305.1174.v2), 2023-05-22
Supplement: Supplementary file 1 [file supplementary]

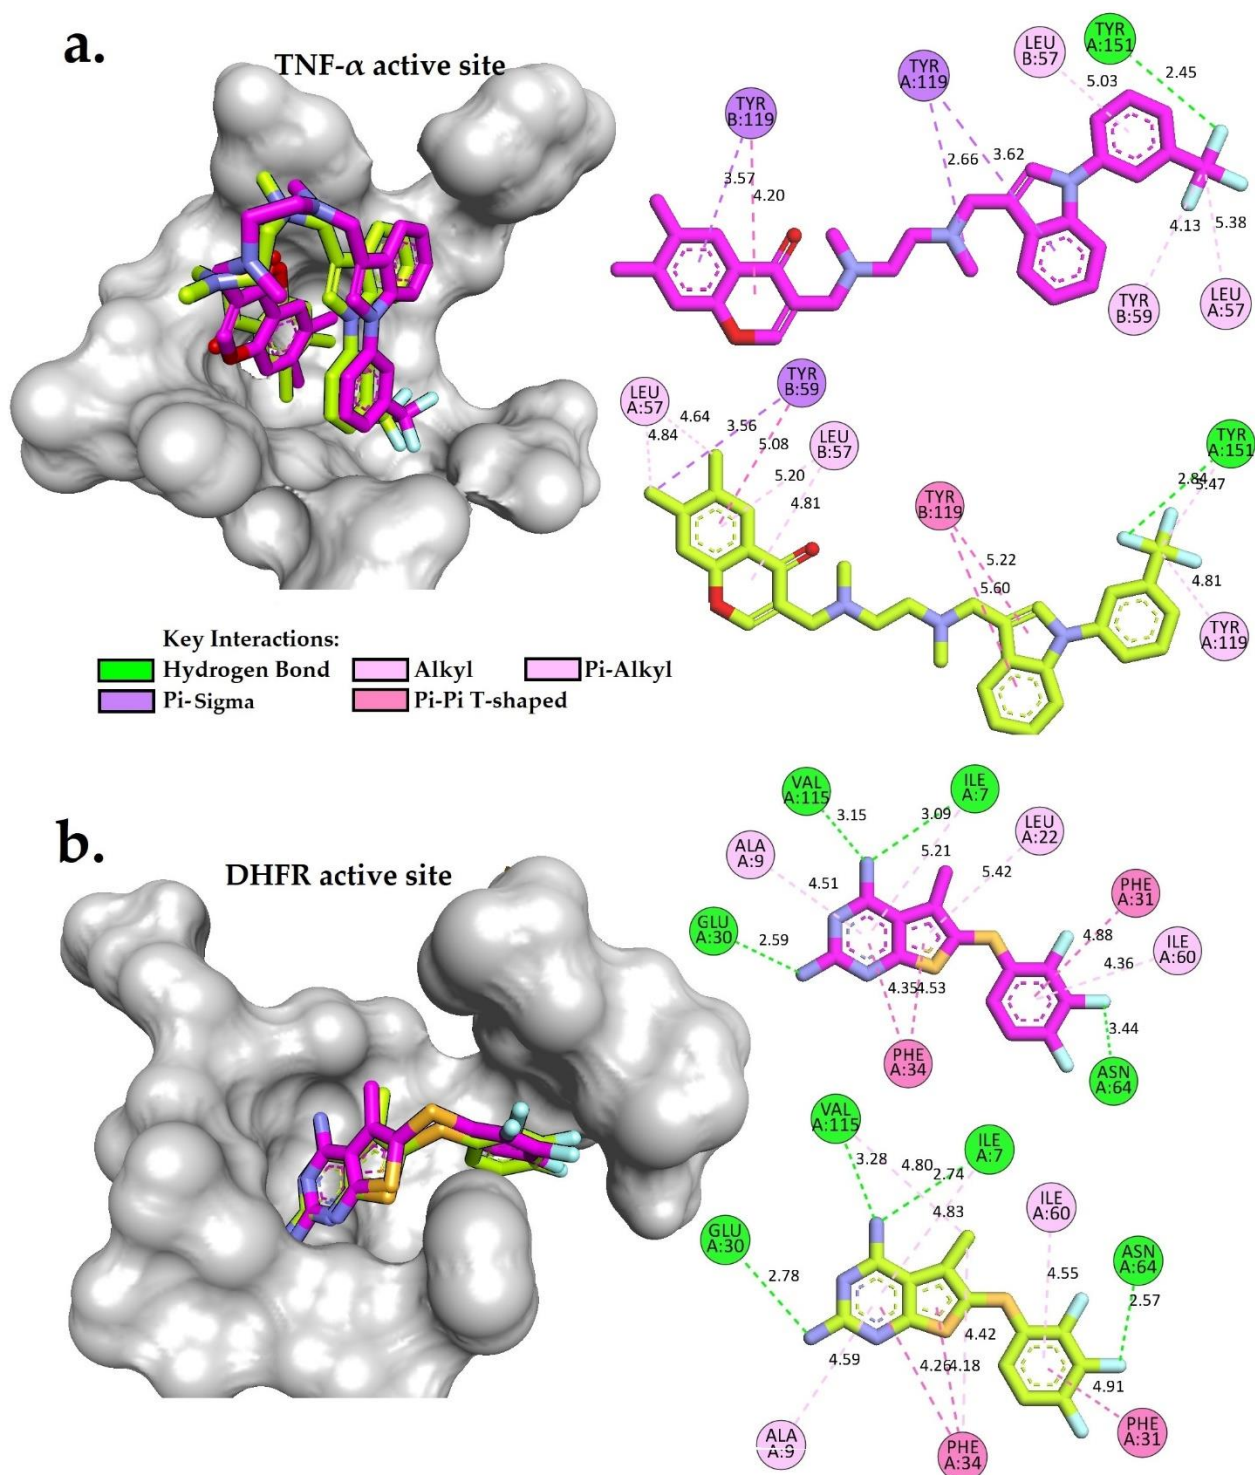

**Figure S1.** a) Superimposition of the original crystal structure (C pink, O red, F cyan, S orange, and N blue) and docked model (C lime, O red, F cyan, S orange, and N blue) into the active binding site of the Tumor Necrosis Factor Alpha (TNF- $\alpha$ ) crystal structure (PDB ID: 2AZ5) and their 2D interactions (RMSD = 0.98 Å). b) Superimposition of the original crystal structure (C pink, O red, F cyan, S orange, and N blue) and the docked model (C lime, O red, F cyan, S orange, and N blue) into the active binding site of dihydrofolate reductase (DHFR) crystal structure (PDB ID: 5HQY) with RMSD = 0.62 Å and their 2D interactions. Some regions of the protein are omitted to facilitate visualization. These models were generated using BIOVIA Discovery Studio Visualizer.
